# Supplementary material for: Modular Design of Artificial Tissue Homeostasis: Robust Control through Synthetic Cellular Heterogeneity
Source: PLOS journal article supplement (doi:10.1371/journal.pcbi.1002579), 2012-07-19
Supplement: S25 (10.1371/journal.pcbi.1002579.s025) [file journal.pcbi.1002579.s025]

| Feature Name                | Description                                                                                                                                                                            |
|-----------------------------|----------------------------------------------------------------------------------------------------------------------------------------------------------------------------------------|
| Value $_{x=[AI3],y=[A3]}$   | Phenotype value at a particular pair of $[AI3],[A3]$ input values.                                                                                                                     |
| Integral                    | Sum of all values over the image.                                                                                                                                                      |
| Max                         | Max value over the image.                                                                                                                                                              |
| Min                         | Min value over the image.                                                                                                                                                              |
| Mean                        | Mean value over the image.                                                                                                                                                             |
| $\sigma$                    | Standard deviation over the image.                                                                                                                                                     |
| Entropy                     | Entropy over the image.                                                                                                                                                                |
| Contrast                    | See <code>graycoprops()</code> , Matlab (Natick, MA)                                                                                                                                   |
| Correlation                 | See <code>graycoprops()</code> , Matlab (Natick, MA)                                                                                                                                   |
| Energy                      | See <code>graycoprops()</code> , Matlab (Natick, MA)                                                                                                                                   |
| Homogeneity                 | See <code>graycoprops()</code> , Matlab (Natick, MA)                                                                                                                                   |
| Area                        | See <code>regionprops()</code> , Matlab (Natick, MA)                                                                                                                                   |
| Centriod                    | See <code>regionprops()</code> , Matlab (Natick, MA)                                                                                                                                   |
| Bounding Box                | See <code>regionprops()</code> , Matlab (Natick, MA)                                                                                                                                   |
| Major Axis Length           | See <code>regionprops()</code> , Matlab (Natick, MA)                                                                                                                                   |
| Minor Axis Length           | See <code>regionprops()</code> , Matlab (Natick, MA)                                                                                                                                   |
| Eccentricity                | See <code>regionprops()</code> , Matlab (Natick, MA)                                                                                                                                   |
| Orientation                 | See <code>regionprops()</code> , Matlab (Natick, MA)                                                                                                                                   |
| Convex Area                 | See <code>regionprops()</code> , Matlab (Natick, MA)                                                                                                                                   |
| Filled Area                 | See <code>regionprops()</code> , Matlab (Natick, MA)                                                                                                                                   |
| Euler Number                | See <code>regionprops()</code> , Matlab (Natick, MA)                                                                                                                                   |
| Equivalent Diameter         | See <code>regionprops()</code> , Matlab (Natick, MA)                                                                                                                                   |
| Solidity                    | See <code>regionprops()</code> , Matlab (Natick, MA)                                                                                                                                   |
| Extent                      | See <code>regionprops()</code> , Matlab (Natick, MA)                                                                                                                                   |
| Perimeter                   | See <code>regionprops()</code> , Matlab (Natick, MA)                                                                                                                                   |
| Pattern Matching            | Compare two-input function to mean functions calculated for every S/N (binned by integer) in a training set. Record S/N at which pattern most closely fits according to least-squares. |
| Pattern Matching $_{i=S/N}$ | Compare image to mean function calculated for S/N= $i$ (binned by integer) in a training set. Record the sum-of-squares difference calculated over the two-input space.                |
| Pattern Matching $_{Norm}$  | Same as “Pattern Matching,” but images (and the averages to which they are compared) are mean-centered and variance-normalized.                                                        |

**Table S6:** Features used to analyze throttle behavior. These features were measured for each throttle phenotype (see Table S5), where “image” refers to the observed phenotype as a response to the two inputs,  $A3$  and  $AI3$  (see Figure S14).
