# Supplementary material for: Modular Design of Artificial Tissue Homeostasis: Robust Control through Synthetic Cellular Heterogeneity
Source: PLOS journal article supplement (doi:10.1371/journal.pcbi.1002579), 2012-07-19
Supplement: S27 (10.1371/journal.pcbi.1002579.s027) [file journal.pcbi.1002579.s027]

| $S_i^T$ | Phenotype/Rates          | Feature Name                                                                               |
|---------|--------------------------|--------------------------------------------------------------------------------------------|
| 0.55    | R7 T to St. St.          | Value at $A3 = 0.34$ , $AI3 = 0.06$                                                        |
| 0.16    | Peak                     | Extent when image is thresholded at 90% max value                                          |
| 0.06    | $\sigma$ R7 T to St. St. | Bounding Box (corner of high $A3$ , low $AI3$ ) when image is thresholded at 10% max value |
| 0.06    | No Switch Value          | Pattern Matching                                                                           |
| 0.04    | No Switch Value          | Pattern Matching <sub>Norm</sub>                                                           |
| 0.03    | $H_{At}$                 |                                                                                            |
| 0.03    | $\sigma$ T to St. St.    | Pattern Matching <sub>Norm</sub>                                                           |

**Table S8:** Top RS-HDMR identified throttle features and their corresponding RS-HDMR sensitivity indices,  $S_i^T$  (table supplements Figure 8H).
