# Supplementary material for: Modular Design of Artificial Tissue Homeostasis: Robust Control through Synthetic Cellular Heterogeneity
Source: PLOS journal article supplement (doi:10.1371/journal.pcbi.1002579), 2012-07-19
Supplement: S28 (10.1371/journal.pcbi.1002579.s028) [file journal.pcbi.1002579.s028]

|                      | <b>System 1</b>                                                                                                                                                                          | <b>System 2</b>                                                                                                                                                                               | <b>System 3</b>                                                                                                                                                                                                                                                                                           | <b>System 4</b>                                                                                                                                                                                                                                                                                                                              |
|----------------------|------------------------------------------------------------------------------------------------------------------------------------------------------------------------------------------|-----------------------------------------------------------------------------------------------------------------------------------------------------------------------------------------------|-----------------------------------------------------------------------------------------------------------------------------------------------------------------------------------------------------------------------------------------------------------------------------------------------------------|----------------------------------------------------------------------------------------------------------------------------------------------------------------------------------------------------------------------------------------------------------------------------------------------------------------------------------------------|
| <b>Advantages</b>    | <ul style="list-style-type: none"> <li>• Simplicity</li> <li>• Analytical solutions</li> </ul>                                                                                           | <ul style="list-style-type: none"> <li>• Intermediate simplicity</li> <li>• Rapid feedback for reduced oscillations and improved homeostasis</li> </ul>                                       | <ul style="list-style-type: none"> <li>• Oscillator generates population heterogeneity.</li> <li>• Oscillator behavior and its ability to maintain homeostasis is well insulated from parameter values of other modules.</li> <li>• Improves homeostasis when intercellular signaling is slow.</li> </ul> | <ul style="list-style-type: none"> <li>• Throttle generates population heterogeneity.</li> <li>• Improves homeostasis when toggle switching times are slow.</li> <li>• Works well for various intercellular signaling rates.</li> <li>• Better overall performance relative to System 3 with intermediate molecular noise levels.</li> </ul> |
| <b>Disadvantages</b> | <ul style="list-style-type: none"> <li>• Poor population heterogeneity</li> <li>• Undesired oscillations in <math>\beta</math>-cell population levels due to delayed feedback</li> </ul> | <ul style="list-style-type: none"> <li>• Poor population heterogeneity</li> <li>• Highly dependent on reaction rates: requires rapid toggle switching and intercellular signaling.</li> </ul> | <ul style="list-style-type: none"> <li>• Reduced performance relative to System 4 with slow toggle switching and intercellular signaling.</li> <li>• Requires significant molecular noise to operate well relative to System 4.</li> </ul>                                                                | <ul style="list-style-type: none"> <li>• Requires a third intercellular signal.</li> <li>• Optimal performance requires parameter fine-tuning to match other modules.</li> </ul>                                                                                                                                                             |
