# Supplementary material for: Modular Design of Artificial Tissue Homeostasis: Robust Control through Synthetic Cellular Heterogeneity
Source: PLoS Comput Biol. 2012 Jul 19;8(7):e1002579. doi: 10.1371/journal.pcbi.1002579 (PMC3400602; doi:10.1371/journal.pcbi.1002579)
Supplement: Table S4 — Phenotypes for the oscillator module (see Figure 8A ). (PDF) [file pcbi.1002579.s023.pdf]

| Phenotype Name            | Description                                                                                                                                            |
|---------------------------|--------------------------------------------------------------------------------------------------------------------------------------------------------|
| Duration High             | Average duration of the intervals where $R4$ concentration is above 50% of the dynamic range.                                                          |
| Duration Low              | Average duration of the intervals where $R4$ concentration is below 50% of the dynamic range.                                                          |
| Period                    | Average time interval between two switches from high to low concentrations of $R4$ .                                                                   |
| Fraction High             | Fraction of the time when $R4$ concentration is high ( $Duration\ High/Period$ ).                                                                      |
| $\sigma_{Duration\ High}$ | Standard deviation of the duration of the intervals where $R4$ concentration is high.                                                                  |
| $\sigma_{Duration\ Low}$  | Standard deviation of the duration of the intervals where $R4$ concentration is high.                                                                  |
| $\sigma_{Period}$         | Standard deviation of the time interval between two switches from high to low concentrations of $R4$ .                                                 |
| High Value                | Average concentration of $R4$ when $R4$ has a high concentration.                                                                                      |
| Low Value                 | Average concentration of $R4$ when $R4$ has a low concentration.                                                                                       |
| Dynamic Range             | Difference between the high and low values divided by the high value.                                                                                  |
| $CV_{Period}$             | Coefficient of variation of the Period: standard deviation of the Period divided by its mean ( $\sigma_{Period}/Period$ ).                             |
| $CV_{High}^P$             | Standard deviation of the Duration High divided by the mean Period ( $\sigma_{Duration\ High}/Period$ ).                                               |
| $CV_{Low}^P$              | Standard deviation of the Duration Low divided by the mean Period ( $\sigma_{Duration\ Low}/Period$ ).                                                 |
| $CV_{High}$               | Standard deviation of the duration of the intervals where $R4$ concentration is high divided by its mean ( $\sigma_{Duration\ High}/Duration\ High$ ). |
| $CV_{Low}$                | Standard deviation of the duration of the intervals where $R4$ concentration is low divided by its mean ( $\sigma_{Duration\ Low}/Duration\ Low$ ).    |
| Peak Integral             | $Duration\ High$ multiplied by $High\ Value$ .                                                                                                         |

**Table S4:** Phenotypes for the oscillator module (see Figure 8A).
